# Supplementary material for: Phosphorylation of Human Choline Kinase Beta by Protein Kinase A: Its Impact on Activity and Inhibition
Source: PubMed Central journal article supplement (PMC4858151; doi:10.1371/journal.pone.0154702), 2016-05-05
Supplement: pone.0154702.s001.pdf [file pone.0154702.s001.pdf]

## Protein Family Summary

Filter    Significance threshold p <     Max. number of families  [\[help\]](#)  
 Ions score or expect cut-off     Dendrograms cut at

Proteins (8)    [Quantitation \(8\)](#)    [Unassigned \(1320\)](#)

### Protein families 1-8 (out of 8)

10 per page    1          
 Accession          Match case

|     |            |     |                                            |         |         |      |                                            |
|-----|------------|-----|--------------------------------------------|---------|---------|------|--------------------------------------------|
| ▼ 2 | gi 6978649 | 284 | choline/ethanolamine kinase [Homo sapiens] |         |         |      |                                            |
| 1.1 | gi 6978649 | 284 | 45242                                      | 37 (13) | 22 (11) | 1.50 | choline/ethanolamine kinase [Homo sapiens] |

▶ 1 sameset of gi|6978649

### ▼ 37 peptide matches (36 non-duplicate, 1 duplicate)

Auto-fit to window

| Query Dupes            | Observed        | Mr(expt)         | Mr(calc)         | ppm           | M        | Score     | Expect          | Rank | U | Peptide                                               |
|------------------------|-----------------|------------------|------------------|---------------|----------|-----------|-----------------|------|---|-------------------------------------------------------|
| <a href="#">67</a>     | 388.2009        | 774.3872         | 774.3872         | 0.092         | 0        | 18        | 0.86            | ▶1   | U | K.DGLQQSK.C                                           |
| <a href="#">103</a>    | 416.2225        | 830.4304         | 830.4286         | 2.20          | 0        | 22        | 0.17            | ▶1   | U | R.HYLAEAK.K                                           |
| <a href="#">125</a>    | 435.7375        | 869.4604         | 869.4607         | -0.25         | 0        | 1         | 4.1             | ▶3   | U | R.VQPEELR.V                                           |
| <a href="#">168</a> ▶1 | 468.6884        | 935.3622         | 935.3627         | -0.45         | 1        | 27        | 0.11            | ▶1   | U | R.RASSLSR.D + 2 Phospho (ST)                          |
| <a href="#">241</a>    | <b>501.7458</b> | <b>1001.4770</b> | <b>1001.4778</b> | <b>-0.75</b>  | <b>0</b> | <b>36</b> | <b>0.0022</b>   | ▶1   | U | K.GQLTSVHSSS.-                                        |
| <a href="#">248</a>    | 506.7555        | 1011.4964        | 1011.4975        | -0.99         | 2        | 15        | 1.3             | ▶2   | U | R.RASSLSR.D + Phospho (ST)                            |
| <a href="#">265</a>    | 513.7877        | 1025.5608        | 1025.5618        | -0.90         | 1        | 21        | 0.42            | ▶1   | U | R.VQPEELR.V                                           |
| <a href="#">327</a>    | <b>541.7293</b> | <b>1081.4440</b> | <b>1081.4441</b> | <b>-0.068</b> | <b>0</b> | <b>38</b> | <b>0.00096</b>  | ▶1   | U | K.GQLTSVHSSS.- + Phospho (ST)                         |
| <a href="#">348</a>    | 546.7375        | 1091.4604        | 1091.4638        | -3.05         | 2        | 4         | 1.2             | ▶4   | U | R.RASSLSR.D + 2 Phospho (ST)                          |
| <a href="#">350</a>    | 546.7388        | 1091.4630        | 1091.4638        | -0.67         | 2        | 7         | 1.1             | ▶2   | U | R.RASSLSR.D + 2 Phospho (ST)                          |
| <a href="#">351</a>    | 364.8284        | 1091.4634        | 1091.4638        | -0.37         | 2        | 16        | 1.3             | ▶2   | U | R.RASSLSR.D + 2 Phospho (ST)                          |
| <a href="#">360</a>    | 550.3219        | 1098.6292        | 1098.6284        | 0.73          | 0        | 12        | 0.71            | ▶1   | U | R.EPVLAAIATK.M                                        |
| <a href="#">408</a>    | 568.2827        | 1134.5508        | 1134.5498        | 0.89          | 0        | 17        | 1.1             | ▶2   | U | R.FQYFQOK.G                                           |
| <a href="#">478</a>    | 586.2582        | 1170.5018        | 1170.5030        | -0.98         | 1        | 15        | 1.3             | ▶2   | U | R.ASSLRDAER.R + Phospho (ST)                          |
| <a href="#">487</a>    | <b>588.7774</b> | <b>1175.5402</b> | <b>1175.5418</b> | <b>-1.34</b>  | <b>0</b> | <b>56</b> | <b>0.00017</b>  | ▶1   | U | K.GETLSQEEQR.K                                        |
| <a href="#">591</a>    | 626.2416        | 1250.4686        | 1250.4693        | -0.53         | 1        | 18        | 0.19            | ▶1   | U | R.ASSLRDAER.R + 2 Phospho (ST)                        |
| <a href="#">592</a>    | 626.2424        | 1250.4702        | 1250.4693        | 0.75          | 1        | 0         | 1               | ▶1   | U | R.ASSLRDAER.R + 2 Phospho (ST)                        |
| <a href="#">668</a>    | <b>652.8253</b> | <b>1303.6360</b> | <b>1303.6368</b> | <b>-0.56</b>  | <b>1</b> | <b>70</b> | <b>1.3e-005</b> | ▶1   | U | K.KGETLSQEEQR.K                                       |
| <a href="#">669</a>    | 435.5532        | 1303.6378        | 1303.6368        | 0.76          | 1        | 24        | 0.057           | ▶1   | U | K.KGETLSQEEQR.K                                       |
| <a href="#">721</a>    | 448.5933        | 1342.7581        | 1342.7608        | -2.07         | 0        | 9         | 1.2             | ▶2   | U | R.LEQYIPSRPLK.T                                       |
| <a href="#">722</a>    | <b>672.3873</b> | <b>1342.7600</b> | <b>1342.7608</b> | <b>-0.60</b>  | <b>0</b> | <b>36</b> | <b>0.019</b>    | ▶1   | U | R.LEQYIPSRPLK.T                                       |
| <a href="#">788</a>    | 704.2911        | 1406.5676        | 1406.5704        | -1.97         | 2        | 10        | 2.4             | ▶3   | U | R.RASSLSRDAER.R + 2 Phospho (ST)                      |
| <a href="#">789</a>    | 704.2917        | 1406.5688        | 1406.5704        | -1.12         | 2        | 11        | 1.2             | ▶5   | U | R.ASSLRDAER.R + 2 Phospho (ST)                        |
| <a href="#">790</a>    | 469.8636        | 1406.5690        | 1406.5704        | -1.03         | 2        | 9         | 1.2             | ▶3   | U | R.RASSLSRDAER.R + 2 Phospho (ST)                      |
| <a href="#">792</a>    | 704.2921        | 1406.5696        | 1406.5704        | -0.55         | 2        | 15        | 0.29            | ▶1   | U | R.RASSLSRDAER.R + 2 Phospho (ST)                      |
| <a href="#">811</a>    | <b>715.3977</b> | <b>1428.7808</b> | <b>1428.7824</b> | <b>-1.07</b>  | <b>1</b> | <b>67</b> | <b>8.6e-006</b> | ▶1   | U | R.KLEEDLLVEVSR.Y                                      |
| <a href="#">867</a>    | 744.2761        | 1486.5376        | 1486.5367        | 0.61          | 2        | 5         | 0.82            | ▶1   | U | R.RASSLSRDAER.R + 3 Phospho (ST)                      |
| <a href="#">900</a>    | <b>760.3979</b> | <b>1518.7812</b> | <b>1518.7831</b> | <b>-1.21</b>  | <b>0</b> | <b>49</b> | <b>0.00013</b>  | ▶1   | U | R.SLGPQLYGVFPEGR.L                                    |
| <a href="#">906</a>    | <b>761.4261</b> | <b>1520.8376</b> | <b>1520.8351</b> | <b>1.67</b>   | <b>0</b> | <b>41</b> | <b>0.00033</b>  | ▶1   | U | R.VYPVSGGLSMLLFR.C                                    |
| <a href="#">976</a>    | 534.8962        | 1601.6668        | 1601.6677        | -0.56         | 0        | 20        | 0.4             | ▶1   | U | K.HAQFHGHEMFFTK.E + 3 Oxidation (M)                   |
| <a href="#">977</a>    | <b>801.8425</b> | <b>1601.6704</b> | <b>1601.6677</b> | <b>1.74</b>   | <b>0</b> | <b>40</b> | <b>0.0018</b>   | ▶1   | U | K.HAQFHGHEMFFTK.E + 3 Oxidation (M)                   |
| <a href="#">1012</a>   | 827.8621        | 1653.7096        | 1653.7070        | 1.63          | 1        | 30        | 0.012           | ▶1   | U | K.DGLQQSKCPDTPK.R + Carbamidomethyl (C); Phospho (ST) |
| <a href="#">1058</a>   | <b>564.9383</b> | <b>1691.7931</b> | <b>1691.7937</b> | <b>-0.38</b>  | <b>0</b> | <b>31</b> | <b>0.0032</b>   | ▶1   | U | R.CSLPDHLPVGEPR.E + Carbamidomethyl (C)               |
| <a href="#">1059</a>   | <b>846.9056</b> | <b>1691.7966</b> | <b>1691.7937</b> | <b>1.73</b>   | <b>0</b> | <b>34</b> | <b>0.003</b>    | ▶1   | U | R.CSLPDHLPVGEPR.E + Carbamidomethyl (C)               |
| <a href="#">1084</a>   | <b>863.9865</b> | <b>1725.9584</b> | <b>1725.9625</b> | <b>-2.33</b>  | <b>1</b> | <b>46</b> | <b>6.9e-005</b> | ▶1   | U | K.TQELREPVLSAAIATK.M                                  |
| <a href="#">1085</a>   | 576.3269        | 1725.9589        | 1725.9625        | -2.08         | 1        | 18        | 0.16            | ▶1   | U | K.TQELREPVLSAAIATK.H                                  |

**S1 Fig. Mass spectrometry analysis of phosphorylated CKβ.** Fifteen peptide fragments were found to be phosphorylated; the range of the ion score was from 4 to 38. A total of 13 peptide fragments covered the amino acid sequence Arg 36 to Arg 43 (RRASSLSR).
