# Supplementary material for: Phosphorylation of Human Choline Kinase Beta by Protein Kinase A: Its Impact on Activity and Inhibition
Source: PubMed Central journal article supplement (PMC4858151; doi:10.1371/journal.pone.0154702), 2016-05-05
Supplement: pone.0154702.s002.pdf [file pone.0154702.s002.pdf]

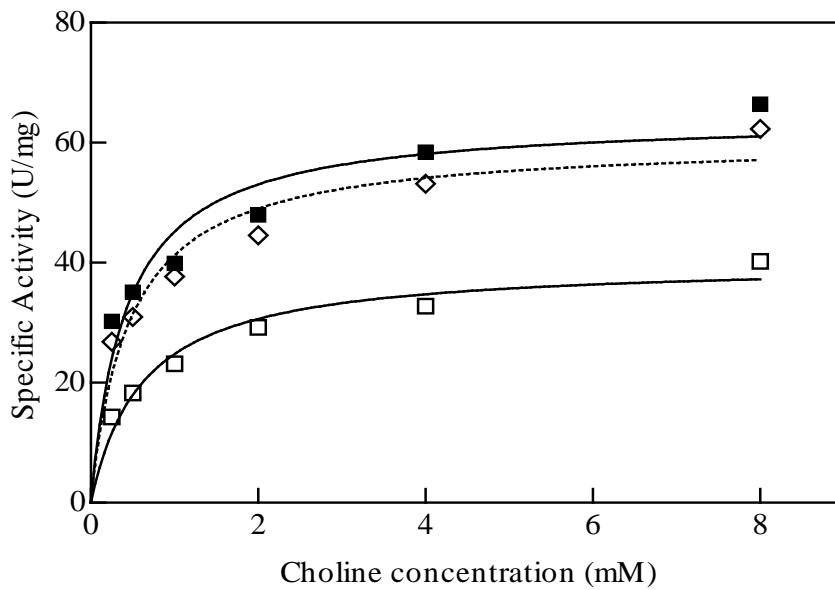

|   |                      |                                    |
|---|----------------------|------------------------------------|
| □ | Unphosphorylated CKβ | $V_{\max}$ : $40.14 \pm 1.26$ U/mg |
|   |                      | $K_m$ : $0.62 \pm 0.072$ mM        |
| ■ | Phosphorylated CKβ   | $V_{\max}$ : $64.27 \pm 2.39$ U/mg |
|   |                      | $K_m$ : $0.42 \pm 0.065$ mM        |
| ◇ | S39D/S40D CKβ        | $V_{\max}$ : $60.42 \pm 2.14$ U/mg |
|   |                      | $K_m$ : $0.46 \pm 0.067$ mM        |

**S2 Fig. Effect of the phosphorylation mimic double-mutation on the catalytic activity of CKβ with choline as substrate, at constant ATP concentration (2 mM).** Each data point represents the average of three independent measurements.
