# Supplementary material for: Phosphorylation of Human Choline Kinase Beta by Protein Kinase A: Its Impact on Activity and Inhibition
Source: PubMed Central journal article supplement (PMC4858151; doi:10.1371/journal.pone.0154702), 2016-05-05
Supplement: pone.0154702.s004.pdf [file pone.0154702.s004.pdf]

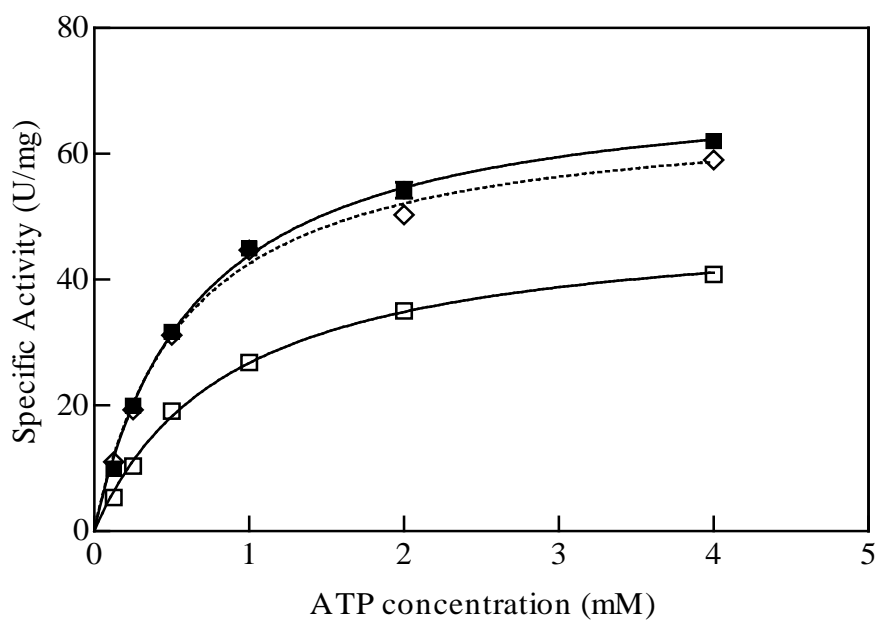

|   |                      |                                    |
|---|----------------------|------------------------------------|
| □ | Unphosphorylated CKβ | $V_{\max}$ : $50.11 \pm 0.72$ U/mg |
|   |                      | $K_m$ : $0.87 \pm 0.034$ mM        |
| ■ | Phosphorylated CKβ   | $V_{\max}$ : $72.46 \pm 1.19$ U/mg |
|   |                      | $K_m$ : $0.65 \pm 0.032$ mM        |
| ◇ | S39D/S40D CKβ        | $V_{\max}$ : $67.31 \pm 1.13$ U/mg |
|   |                      | $K_m$ : $0.58 \pm 0.030$ mM        |

**S4 Fig. Effect of the phosphorylation mimic double-mutation on the catalytic activity of CKβ with ATP as substrate, at constant choline concentration (4 mM). Each data point represents the average of three independent measurements.**
